# Supplementary material for: Single-molecule observations for determining the orientation and diffusivity of dye molecules in lipid bilayers
Source: Royal Society of Chemistry journal article supplement (doi:10.1039/c3cp51585k), 2013-01-01
Supplement: c3cp51585k.pdf [file c3cp51585k.pdf]

## Supporting information

# Single-Molecule Observations for Determining the Orientation and Diffusivity of Dye Molecules in Lipid Bilayers

*Toshinori Motegi<sup>†</sup>, Hideki Nabika<sup>‡</sup>, Kei Murakoshi<sup>\*</sup>*

Department of Chemistry, Faculty of Science, Hokkaido University,  
N10W8, Kita, Sapporo 060-0810, Japan

<sup>†</sup>present address: Electronics-Inspired Interdisciplinary Research Institute (EIIRIS), Toyohashi  
University of Technology, 1-1 Hibarigaoka, Tempaku-cho, Toyohashi 441-8580, Japan

<sup>‡</sup> present address: Department of Chemistry, Faculty of Material and Biological Science, Yamagata  
University, Yamagata 990-8560, Japan

<sup>\*</sup>To whom correspondence should be addressed.

E-mail: kei@sci.hokudai.ac.jp

Fax: +81-11-706-4810. ; Tel: +81-11-706-2704.

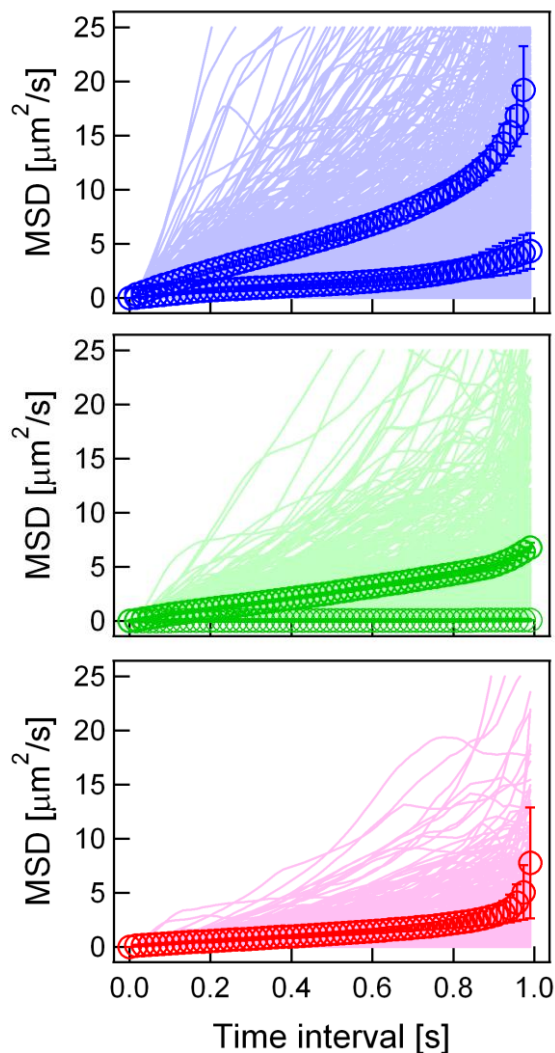

Figure S1. Light color: Mean squared displacement (MSD) analysis results for the trajectories observed at cholesterol concentrations of 0 mol% (blue), 20 mol% (green) and 40 mol% (red). For cholesterol concentration 0 and 20 mol%, two averaged MSD plots are shown because of presence of the respective lower and higher diffusive component according to the diffusion coefficient ( $D$ ) histogram which were shown as Figure 5 in text. Dark color: Averaged mean squared displacement plots from the MSD plots. Standard errors are represented by the error bars.
